# Supplementary material for: Poor second ovarian stimulation in cynomolgus monkeys (Macaca fascicularis) is associated with the production of antibodies against human follicle-stimulating hormone
Source: PubMed Central journal article supplement — J Reprod Dev. 2019 Mar 7;65(3):267–73. doi: 10.1262/jrd.2018-156 (PMC6584176; doi:10.1262/jrd.2018-156), 2019-03-07
Supplement: jrd-65-267-s001.pdf [file jrd-65-267-s001.pdf]

**Supplementary Fig. 1.**

Comparison of amino acid sequences of FSH $\alpha$  and FSH $\beta$  between human and cynomolgus monkey.

FSH $\alpha$

```
Human      MDYYRKYAAIFLVTLVSVFLHVLHSAPD---VQDCPECTLQENPFFSQPGAPILQCMGCC
Cynomolgus MDYYRKYAAVILVTLVSVFLHILHSFPDGEFTMQDCPECKPRENKFFSKPGAPIYQCMGCC
*****:;*****:*** **      :*****. :** ***:***** *****
```

```
Human      FSRAYPTPLRSKKTMLVQKNVTSESTCCVAKSYNRVTVMGGFKVENHTACHCSTCYHKC
Cynomolgus FSRAYPTPLRSKKTMLVQKNVTSESTCCVAKSLTRVMVMGNVRVENHTQCHCSTCYHKF
*****:*****_* ** **_*:***** *****
```

97/116 (84%)

FSH $\beta$

```
Human      MKTLQFFFLFCCWKAICCNSELTNITIAIEKEEERFCISINTTWCAGYCYTRDLVYKDP
Cynomolgus MKTVQFCFLFCCWKAICCNSELTNITIAIEKEEERFCISINTTWCAGYCYTRDLVYKDP
***: ** *****
```

```
Human      ARPNIQKTCTFKELVYETVRVPGCAHHADSLYTPVATQCHCGKCDSDSTDCVTRGLGPS
Cynomolgus ARPNIQKTCTFKEVVYETVRVPGCAHHADSLYTPVATQCHCGKCDSDSTDCVTRGLGPS
***:*****:*****
```

```
Human      YCSFGEMKE
Cynomolgus YCSFSEMKE
****_*****
```

124/129 (96%)
